# Supplementary material for: Histone lactylation promotes malignant progression by facilitating USP39 expression to target PI3K/AKT/HIF-1α signal pathway in endometrial carcinoma
Source: Cell Death Discov. 2024 Mar 8;10:121. doi: 10.1038/s41420-024-01898-4 (PMC10923933; doi:10.1038/s41420-024-01898-4)
Supplement: Supplementary file 2 — Additional file 2 Table S1. Primers designed for specific promoter regions of USP39. [file 41420_2024_1898_MOESM2_ESM.xlsx]

## Sheet: Sheet1
Location	Name		Sequence
-2000~-1836 bp	USP39 a	F	TTCCTGAGACCCAAGGACAGC
		R	GCCGGTCAGGGAGATCTAAGG
-1374~-1301 bp	USP39 b	F	GGAACAGAACTGTCACCCTGG
		R	GTTGAAGAGAAGGGTCATGGGG
-1300~-1094 bp	USP39 c	F	GGAGCAGCCCTGAAAGGTTTA
		R	GGCTCGGGAGTTGTAGTCTC
-1093~-977 bp	USP39 d	F	TAAGGCTTGATGCCACACCA
		R	TAGCCAGGGCAATTTCCAGAG
-976~-163 bp	USP39 e	F	GCGGACCGTAACATCTGGAA
		R	GATGGTCAGGTGGTTGCCTG
+227~+341 bp	USP39 f	F	TCTAGGAAGCTCTCTCAACGTG
		R	CAGCCAAGTCTTTGTGTCTGC
+342~+623 bp	USP39 g	F	GGCTTATGGTTCCTGTGGCT
		R	GTCGGGAAACACGTCTTGGA
+624~+901 bp	USP39 h	F	GTCGGGAAACACGTCTTGGA
		R	CTGCTTTCCACTGGGTCCAA
